# Supplementary material
Source: Elsevier journal article supplement (https://www.sciencedirect.com/science/article/pii/S0300893216303517)
Supplement: mmc8 [file S0300893216303517:mmc8.pdf]

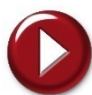

## **Supplementary material**

---

# **Subacute Retrograde TAVI Migration Successfully Treated With a Valve-in-valve Procedure**

---

**Video 1:** Fluoroscopy depicting first prosthesis implantation.

**Video 2:** Fluoroscopy depicting the immediate results of the first prosthesis implantation.

**Video 3:** Long-axis view of 2-dimensional transoesophageal echocardiogram immediately after prosthesis implantation.

**Video 4:** Long-axis view of Doppler transoesophageal echocardiogram immediately after prosthesis implantation.

**Video 5:** Long-axis view of 2-dimensional transoesophageal echocardiogram after prosthesis migration.

**Video 6:** Fluoroscopy depicting first prosthesis after migration. The native valve calcium is clearly visible above the prosthesis.

**Video 7:** Valve-in-valve implantation.
